# Supplementary material for: Differential Expression, Tissue-Specific Distribution, and Posttranslational Controls of Phosphoenolpyruvate Carboxylase
Source: MDPI journal article supplement (doi:10.3390/plants10091887), 2021-09-13
Supplement: s1 [file s1]

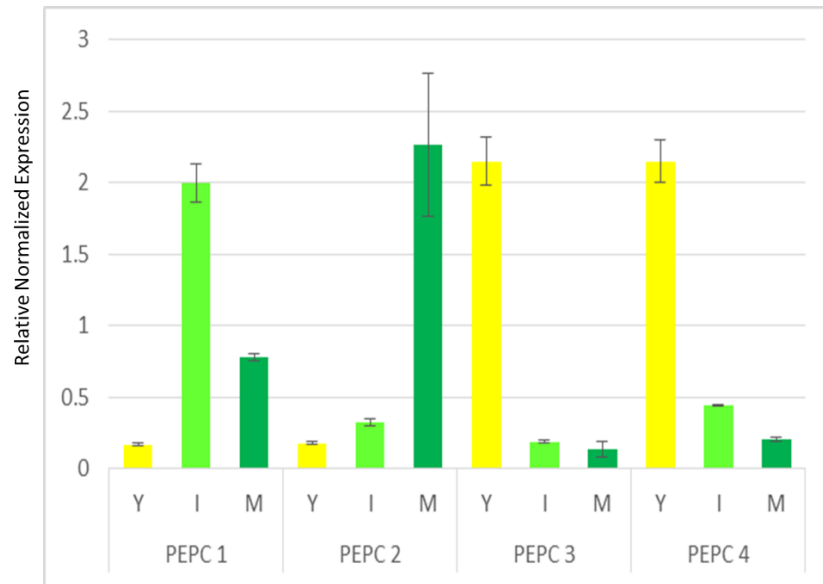

**Figure S1.** Relative normalized RNA expression of *B. sinuspersici* PEPC isoforms in young (Y), intermediate (I), and mature (M) leaf [17].

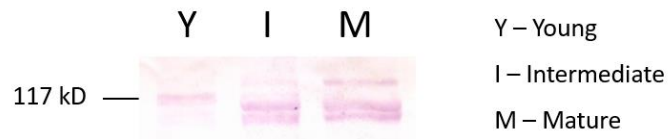

**Figure S2.** Immunoblot samples from young (Y), intermediate (I), and mature (M) leaf extracts showing the expression of a 117 kD BTPC [unpublished].
